# Supplementary material for: Identification of F3H, Major Secondary Metabolite-Related Gene That Confers Resistance against Whitebacked Planthopper through QTL Mapping in Rice
Source: PubMed Central journal article supplement (PMC7823371; doi:10.3390/plants10010081), 2021-01-02
Supplement: plants-10-00081-s001.pdf [file plants-10-00081-s001.pdf]

## Supplementary Materials

**Supplementary Table S1.** QTLs associated with WBPH resistance in the CNDH populations.

| Characteristics | Year | QTLs            | Chromosome | Interval Markers <sup>z</sup> | LOD | Additive effect <sup>y</sup> | $R^2$ <sup>x</sup> | Increasing effects <sup>w</sup> |
|-----------------|------|-----------------|------------|-------------------------------|-----|------------------------------|--------------------|---------------------------------|
| Resistant score | 2018 | <i>qWBPH1</i>   | 1          | RM3482-RM11966                | 4.0 | -0.3                         | 0.3                | Nagdong                         |
|                 |      | <i>qWBPH1-1</i> | 1          | RM3709-RM11694                | 3.5 | 0.3                          | 0.3                | Cheongcheong                    |
|                 |      | <i>qWBPH1-2</i> | 1          | RM11694-RM11669               | 3.3 | 0.5                          | 0.3                | Cheongcheong                    |
|                 |      | <i>qWBPH4</i>   | 4          | RM280-RM127                   | 3.2 | 1.1                          | 0.3                | Cheongcheong                    |
|                 |      | <i>qWBPH8</i>   | 8          | RM17699-RM264                 | 3.3 | 0.7                          | 0.3                | Cheongcheong                    |
|                 | 2019 | <i>qWBPH4-1</i> | 4          | RM280-RM6909                  | 3.5 | 1.1                          | 0.3                | Cheongcheong                    |
|                 |      | <i>qWBPH7</i>   | 7          | RM248-RM1134                  | 3.0 | 1.2                          | 0.3                | Cheongcheong                    |

<sup>z</sup>Interval markers are those within the significance threshold on each border of the QTL range; <sup>y</sup>The proportion of evaluated phenotypic change attributable to a particular QTL was estimated using the coefficient of determination ( $R^2$ ); <sup>x</sup> Positive values of the additive effect indicate that alleles from Cheongcheong are in the direction of increasing the traits; <sup>w</sup> Increase allele is the source of the allele that causes an increase in the measured trait.

**Supplementary Table S2.** Twenty-seven candidate genes identified between RM280 and RM6909 markers and their ORFs, which include various proteins associated with WBPH resistance.

| <b>Function</b> | <b>Chr.</b> | <b>Gene locus</b>     | <b>Description</b>                                        |
|-----------------|-------------|-----------------------|-----------------------------------------------------------|
| Cell function   | 4           | <i>LOC_Os04g55090</i> | Protein prenyltransferase domain containing protein.      |
|                 | 4           | <i>LOC_Os04g57670</i> | Protein prenyltransferase domain containing protein.      |
|                 | 4           | <i>LOC_Os04g57900</i> | Protein prenyltransferase domain containing protein.      |
|                 | 4           | <i>LOC_Os04g58980</i> | Protein prenyltransferase domain containing protein.      |
| Kinase          | 4           | <i>LOC_Os04g55620</i> | Protein kinase domain containing protein.                 |
|                 | 4           | <i>LOC_Os04g56060</i> | Protein kinase-like domain containing protein.            |
|                 | 4           | <i>LOC_Os04g56110</i> | Protein kinase-like domain containing protein.            |
|                 | 4           | <i>LOC_Os04g56360</i> | Protein kinase-like domain containing protein.            |
|                 | 4           | <i>LOC_Os04g56530</i> | Protein kinase-like domain containing protein.            |
|                 | 4           | <i>LOC_Os04g58990</i> | Protein kinase domain containing protein.                 |
| Signaling       | 4           | <i>LOC_Os04g55230</i> | Tetratricopeptide-like helical domain containing protein. |
|                 | 4           | <i>LOC_Os04g55240</i> | VQ domain containing protein.                             |
|                 | 4           | <i>LOC_Os04g55440</i> | Leucine-rich repeat, plant specific containing protein.   |
|                 | 4           | <i>LOC_Os04g56680</i> | Auxin responsive SAUR protein family protein.             |
|                 | 4           | <i>LOC_Os04g56690</i> | Auxin responsive SAUR protein family protein.             |

|                      |   |                       |                                                                                              |
|----------------------|---|-----------------------|----------------------------------------------------------------------------------------------|
|                      | 4 | <i>LOC_Os04g57430</i> | Leucine-rich repeat, plant specific containing protein.                                      |
|                      | 4 | <i>LOC_Os04g57660</i> | Leucine rich repeat, N-terminal domain containing protein.                                   |
|                      | 4 | <i>LOC_Os04g57940</i> | Tetratricopeptide-like helical domain containing protein.                                    |
|                      | 4 | <i>LOC_Os04g58080</i> | Leucine-rich repeat, plant specific containing protein.                                      |
|                      | 4 | <i>LOC_Os04g58180</i> | WD40-like domain containing protein.                                                         |
| Secondary Metabolite | 4 | <i>LOC_Os04g56700</i> | Similar to Naringenin,2-oxoglutarate 3-dioxygenase (EC 1.14.11.9) (Flavanone 3- hydroxylase) |
|                      | 4 | <i>LOC_Os04g56950</i> | Similar to S-adenosyl-L-methionine:salicylic acid carboxyl methyltransferase-like protein.   |
| Transcription factor | 4 | <i>LOC_Os04g55510</i> | Zinc finger, RING-type domain containing protein.                                            |
|                      | 4 | <i>LOC_Os04g55560</i> | Pathogenesis-related transcriptional factor and ERF domain containing protein.               |
|                      | 4 | <i>LOC_Os04g56750</i> | Zinc finger, CCCH-type domain containing protein.                                            |
|                      | 4 | <i>LOC_Os04g57010</i> | Zinc finger, CCCH-type domain containing protein.                                            |
|                      | 4 | <i>LOC_Os04g57600</i> | Zinc finger, CCCH-type domain containing protein.                                            |

---

**Supplementary Table S3.** WBPH resistance gene-specific primers for qRT-PCR.

| Gene          |         | Sequence (5' to 3')     | GC contents (%) | Annealing T <sub>m</sub> (°C) | Product size (bp) |
|---------------|---------|-------------------------|-----------------|-------------------------------|-------------------|
| <i>F3H</i>    | Forward | TTCTCGTACCCGGTGAAGTC    | 55              | 59.5                          | 84                |
|               | Reverse | GCTGTACTGCTCCACCACTG    | 60              | 59.5                          |                   |
| <i>PAL1</i>   | Forward | TGCACGGTGGCAACTCCAG     | 60              | 59.5                          | 95                |
|               | Reverse | CTGCGCGAACATGAGCTTGC    | 60              | 59.5                          |                   |
| <i>NPR1</i>   | Forward | CCGAGCTTTTGGATCTCGCAC   | 57              | 59.8                          | 85                |
|               | Reverse | TTTAGGCTCTCTTCGCCTCGC   | 57              | 59.8                          |                   |
| <i>EIN2</i>   | Forward | GCAGCTCCCTTGGCGTTTGA    | 60              | 59.5                          | 89                |
|               | Reverse | CTTGCACTTGGGTTTGGGCTTTG | 52              | 60.2                          |                   |
| <i>PRB1</i>   | Forward | CGAGAACCTGTCGTGGAACC    | 60              | 59.5                          | 91                |
|               | Reverse | GTAGTCGTAGGAGCCCTTCTC   | 57              | 59.8                          |                   |
| <i>HPL3</i>   | Forward | CAGCAAGGAGGAGGCCATCA    | 60              | 59.5                          | 88                |
|               | Reverse | GACCAGGAACGGCAGGAACA    | 60              | 59.5                          |                   |
| <i>WRKY45</i> | Forward | AGGACATGGAGAAGGGGAAGG   | 57              | 59.8                          | 92                |
|               | Reverse | GAGAATCTGGTCGACGAAGCG   | 57              | 59.8                          |                   |
| <i>COI1</i>   | Forward | GCTGCACCTCGTGATGGGC     | 68              | 61.4                          | 92                |
|               | Reverse | TGAGCGCGTCGATGCGGTG     | 68              | 61.4                          |                   |
| <i>CAS</i>    | Forward | ACGACAGGCAGGAGGCCAAT    | 60              | 59.5                          | 93                |
|               | Reverse | CCAGCTCCATCTCCGCGAAAA   | 57              | 59.8                          |                   |
